# Supplementary material for: Rural-to-urban migrants are at high risk of sexually transmitted and viral hepatitis infections in China: a systematic review and meta-analysis
Source: PubMed Central journal article supplement (PMC4169821; doi:10.1186/1471-2334-14-490), 2014-09-08
Supplement: 12879_2014_3800_MOESM3_ESM.pdf [file 12879_2014_3800_MOESM3_ESM.pdf]

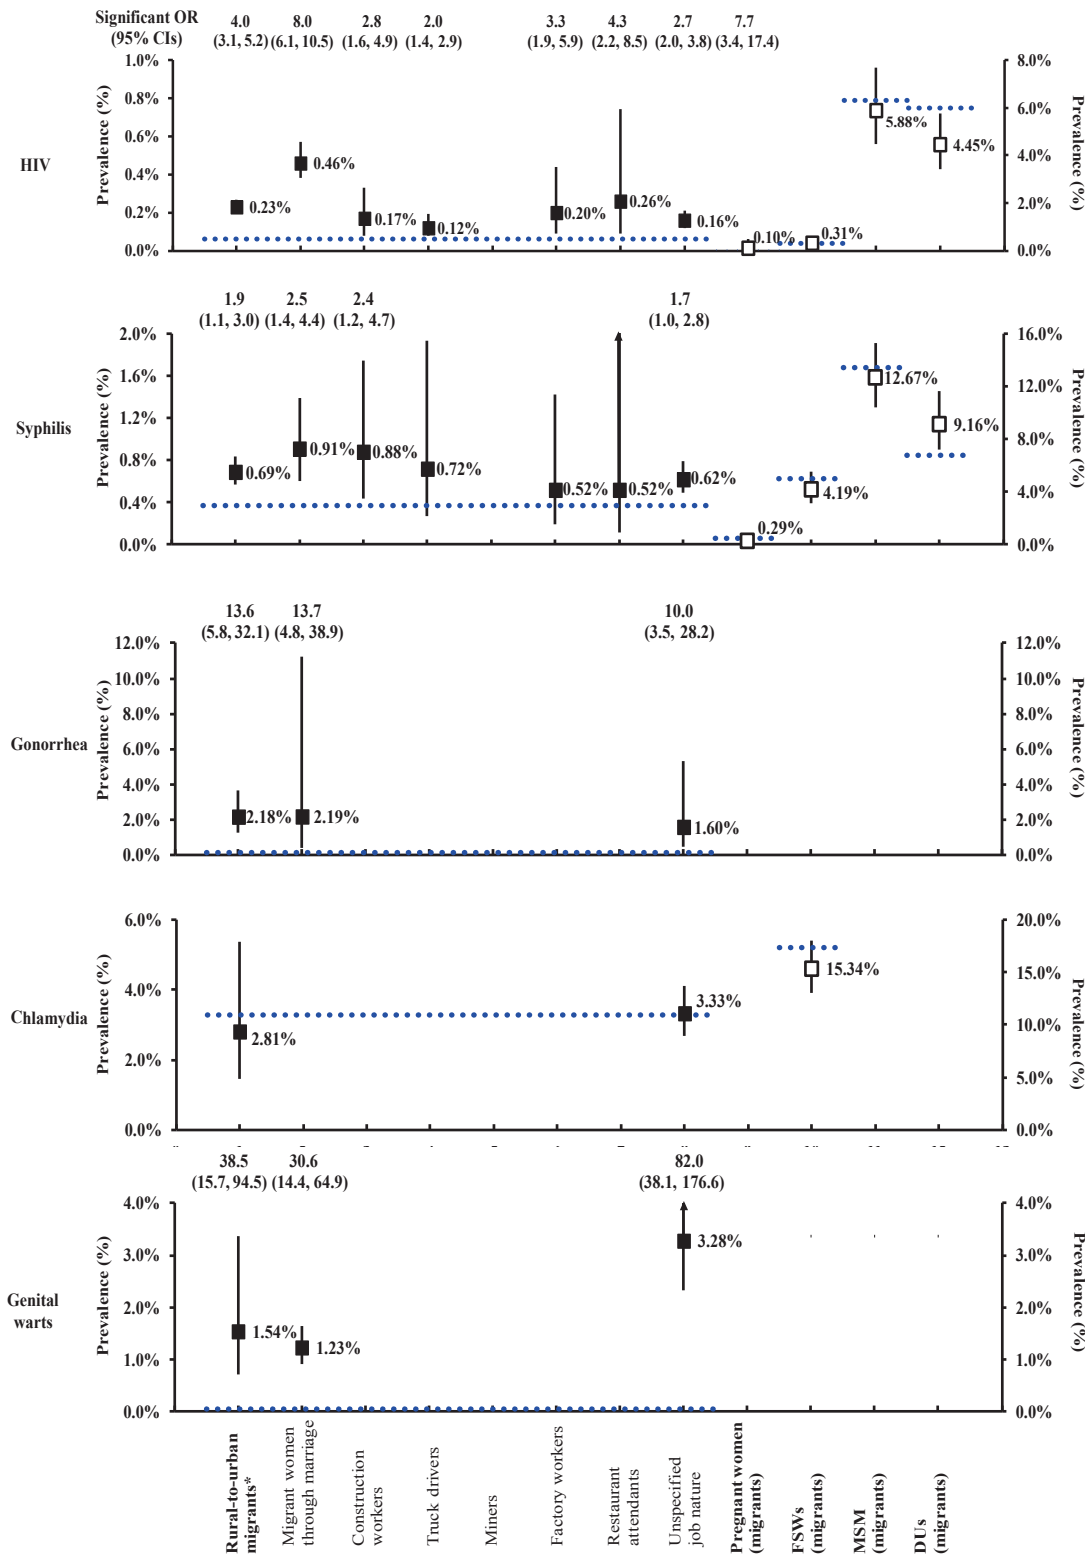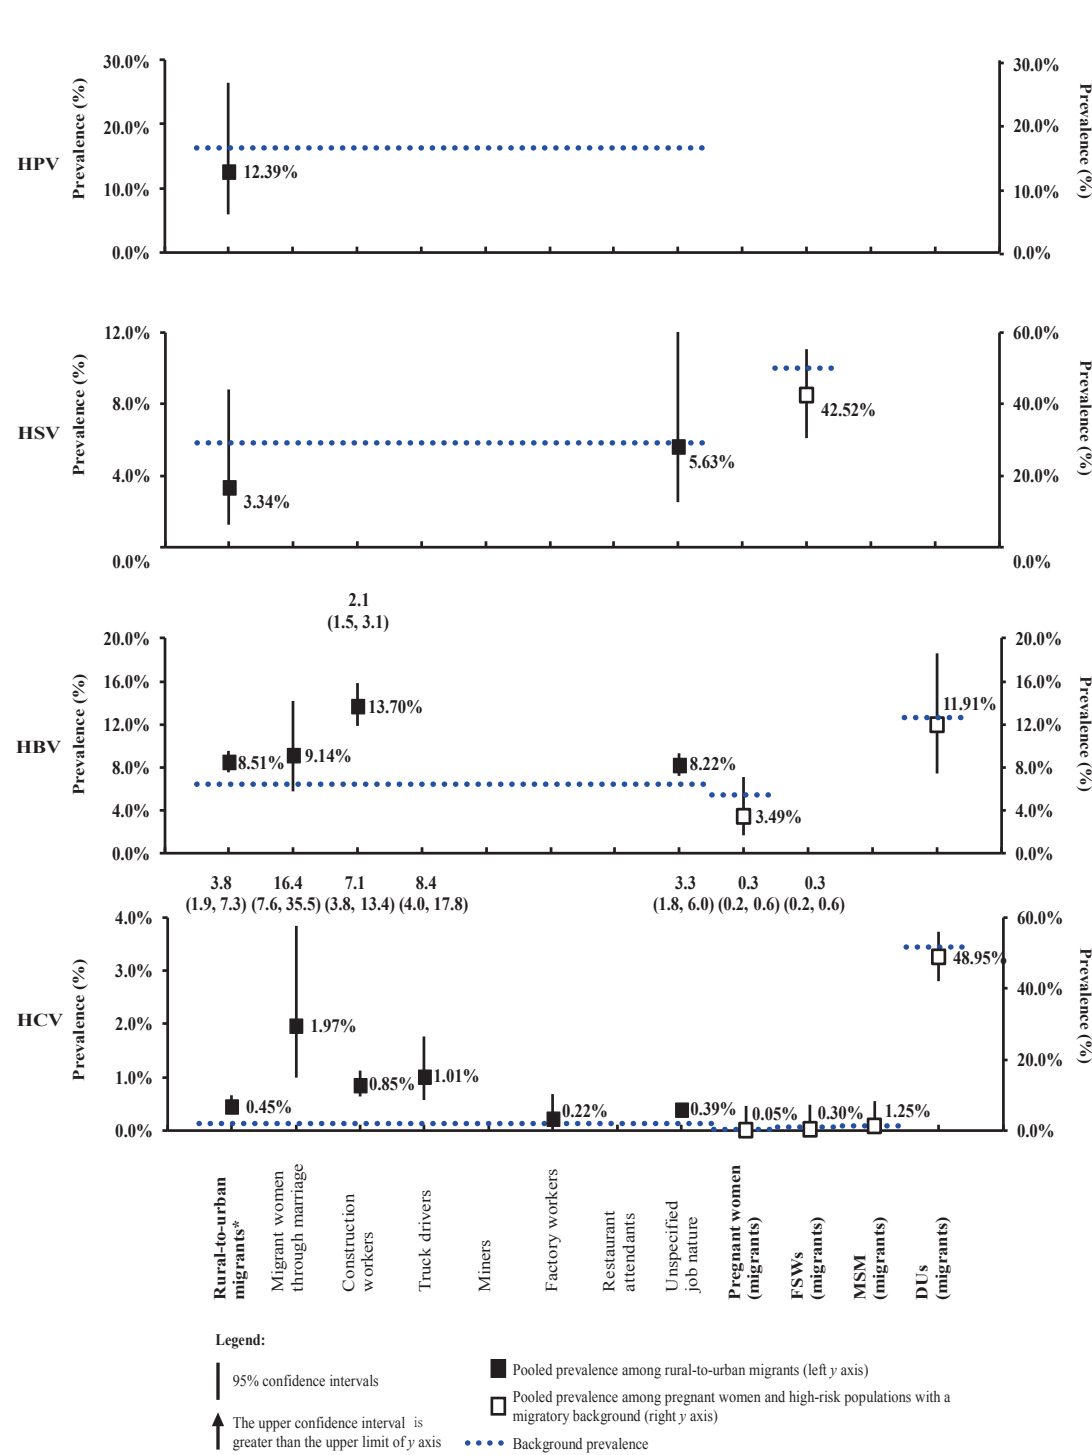

\*Rural-to-urban migrants include migrant women through marriage, construction workers, truck drivers, miners, factory workers, restaurant attendants, and migrants with unspecified job nature.

The figure presents the pooled prevalence of subgroups with more than one study, and only the significant odds ratios and the confidence intervals
